# Supplementary material for: Comparison of Outcomes Between McKeown and Sweet Esophagectomy in the Elderly Patients for Esophageal Squamous Cell Carcinoma: A Propensity Score-Matched Analysis
Source: PubMed Central journal article supplement (PMC7020469; doi:10.1177/1073274820904700), 2020-02-12
Supplement: supplemental_table_1.pdf [file supplemental_table_1.pdf]

Supplemental table 1: Comparison of patient characteristics before propensity score matching between the Sweet and McKeown approaches

| Demographics            | Patients < 70 years     |                   |                     |          | Patients ≥ 70 years     |                   |                     |          |
|-------------------------|-------------------------|-------------------|---------------------|----------|-------------------------|-------------------|---------------------|----------|
|                         | All patients<br>(n) (%) | Sweet<br>approach | McKeown<br>approach | <i>P</i> | All patients<br>(n) (%) | Sweet<br>approach | McKeown<br>approach | <i>P</i> |
| <b>Number</b>           | 638                     | 371               | 267                 |          | 182                     | 111               | 71                  |          |
| <b>Age (y)</b>          | 56.65 ± 7.29            | 56.39 ± 7.49      | 56.66 ± 7.02        | 0.330    | 57.09 ± 7.38            | 57.00 ± 7.51      | 57.19 ± 7.21        | 0.719    |
| <b>Gender</b>           |                         |                   |                     | 0.286    |                         |                   |                     | 0.207    |
| Female                  | 125(19.0)               | 76(20.5)          | 49(18.4)            |          | 59(32.4)                | 39(35.1)          | 20(28.2)            |          |
| Male                    | 513(80.4)               | 295(79.5)         | 218(81.6)           |          | 123(67.6)               | 72(64.9)          | 51(71.8)            |          |
| <b>Location</b>         |                         |                   |                     | <0.001   |                         |                   |                     | 0.001    |
| Upper third             | 69(10.8)                | 12(3.2)           | 57(21.3)            |          | 31(17.0)                | 10(9.0)           | 21(29.6)            |          |
| Middle third            | 258(40.4)               | 144(38.8)         | 114(42.7)           |          | 73(40.1)                | 45(40.5)          | 28(39.4)            |          |
| Lower third             | 311(48.7)               | 215(58.0)         | 96(36.0)            |          | 78(42.9)                | 56(50.5)          | 22(31.0)            |          |
| <b>T stage</b>          |                         |                   |                     | 0.457    |                         |                   |                     | 0.798    |
| 1                       | 76(11.9)                | 41(11.1)          | 35(13.1)            |          | 10(5.5)                 | 7(6.3)            | 3(4.2)              |          |
| 2                       | 136(21.3)               | 75(20.2)          | 61(22.8)            |          | 40(22.0)                | 25(22.5)          | 15(21.1)            |          |
| 3                       | 436(66.8)               | 255(68.7)         | 171(64.0)           |          | 132(72.5)               | 79(71.2)          | 53(74.6)            |          |
| <b>N stage</b>          |                         |                   |                     | 0.316    |                         |                   |                     | 0.795    |
| 0                       | 332(52.0)               | 203(54.7)         | 129(48.3)           |          | 91(50.0)                | 55(49.5)          | 36(50.7)            |          |
| 1                       | 164(25.7)               | 91(24.5)          | 73(27.3)            |          | 62(34.1)                | 36(32.4)          | 26(36.6)            |          |
| 2                       | 106(6.6)                | 55(14.8)          | 51(19.1)            |          | 23(12.6)                | 16(14.4)          | 7(9.9)              |          |
| 3                       | 36(5.6)                 | 22(5.9)           | 14(5.2)             |          | 6(3.3)                  | 4(3.6)            | 2(2.8)              |          |
| <b>Grade</b>            |                         |                   |                     | 0.006    |                         |                   |                     | 0.044    |
| 0                       | 6(0.9)                  | 1(0.3)            | 5(1.9)              |          | 0                       | 0                 | 0                   |          |
| 1                       | 110(17.2)               | 77(20.8)          | 33(12.4)            |          | 44(24.2)                | 26(23.4)          | 18(25.4)            |          |
| 2                       | 327(51.3)               | 189(50.9)         | 138(51.7)           |          | 78(42.9)                | 41(36.9)          | 37(52.1)            |          |
| 3                       | 195(30.6)               | 104(28.0)         | 91(34.1)            |          | 60(33.0)                | 44(39.6)          | 16(22.5)            |          |
| <b>TNM staging</b>      |                         |                   |                     | 0.727    |                         |                   |                     | 0.855    |
| I                       | 15(2.4)                 | 7(1.9)            | 8(3.0)              |          | 4(2.2)                  | 3(2.7)            | 1(1.4)              |          |
| II                      | 205(32.1)               | 116(31.3)         | 89(33.3)            |          | 73(40.1)                | 46(41.4)          | 27(38.0)            |          |
| III                     | 382(59.9)               | 226(60.9)         | 156(58.4)           |          | 99(54.4)                | 58(52.3)          | 41(57.7)            |          |
| IV                      | 36(5.6)                 | 22(5.9)           | 14(5.2)             |          | 6(3.3)                  | 4(3.6)            | 2(2.8)              |          |
| <b>LN resected</b>      | 25.37 ± 13.51           | 19.39 ± 8.43      | 34.37 ± 14.94       | <0.001   | 27.54 ± 12.91           | 23.73 ± 7.81      | 33.49 ± 16.62       | <0.001   |
| <b>Tumor size(cm)</b>   | 3.88 ± 5.42             | 3.88 ± 5.42       | 3.69 ± 1.60         | 0.416    | 3.89 ± 1.53             | 3.94 ± 1.47       | 3.81 ± 1.62         | 0.710    |
| <b>Adjuvant therapy</b> |                         |                   |                     | 0.304    |                         |                   |                     | 0.291    |
| No                      | 376(58.9)               | 215(58.0)         | 161(60.3)           |          | 163(89.6)               | 101(91.0)         | 62(87.3)            |          |
| Yes                     | 262(41.1)               | 156(42.0)         | 106(39.7)           |          | 19(10.4)                | 10(9.0)           | 9(12.7)             |          |

Data are mean ± SD or n (%).

LN= lymph node.
