# Supplementary material for: Comparison of Outcomes Between McKeown and Sweet Esophagectomy in the Elderly Patients for Esophageal Squamous Cell Carcinoma: A Propensity Score-Matched Analysis
Source: PubMed Central journal article supplement (PMC7020469; doi:10.1177/1073274820904700), 2020-02-12
Supplement: supplmental_table_2.pdf [file supplmental_table_2.pdf]

Supplemental table 2. Univariate cox regression analysis of prognostic factors influencing overall survival.

| Variables                | Patients<70 years |              |        | Patients≥70 years |              |        |
|--------------------------|-------------------|--------------|--------|-------------------|--------------|--------|
|                          | HR                | 95% CI       | P      | HR                | 95% CI       | P      |
| <b>Gender</b>            |                   |              |        |                   |              |        |
| Female                   | 1                 |              |        | 1                 |              |        |
| Male                     | 1.488             | 1.084-2.044  | 0.014  | 2.022             | 1.249-3.271  | 0.004  |
| <b>Location</b>          |                   |              |        |                   |              |        |
| Upper third              | 1                 |              |        | 1                 |              |        |
| Middle third             | 1.088             | 0.737-1.606  | 0.671  | 0.592             | 0.364-0.965  | 0.035  |
| Lower third              | 1.051             | 0.715-1.545  | 0.801  | 0.640             | 0.385-1.062  | 0.084  |
| <b>T stage</b>           |                   |              |        |                   |              |        |
| 1                        | 1                 |              |        | 1                 |              |        |
| 2                        | 2.001             | 1.172-3.416  | 0.011  | 2.963             | 0.883-9.940  | 0.079  |
| 3                        | 2.571             | 1.589-4.161  | <0.001 | 3.081             | 0.972-9.769  | 0.056  |
| <b>N stage</b>           |                   |              |        |                   |              |        |
| 0                        | 1                 |              |        | 1                 |              |        |
| 1                        | 2.062             | 1.526-2.788  | <0.001 | 1.759             | 1.122-2.757  | 0.014  |
| 2                        | 3.652             | 2.698-4.944  | <0.001 | 5.293             | 2.969-9.434  | <0.001 |
| 3                        | 5.771             | 3.875-8.595  | <0.001 | 12.364            | 4.898-31.213 | <0.001 |
| <b>Grade</b>             |                   |              |        |                   |              |        |
| 0                        | 1                 |              |        | 1                 |              |        |
| 1                        | 1.081             | 0.262-4.468  | 0.914  | 1                 |              |        |
| 2                        | 1.418             | 0.351-5.725  | 0.624  | 0.752             | 0.469-1.206  | 0.237  |
| 3                        | 1.587             | 0.391-6.440  | 0.518  | 1.431             | 0.850-2.410  | 0.178  |
| <b>TNM staging</b>       |                   |              |        |                   |              |        |
| I                        | 1                 |              |        | 1                 |              |        |
| II                       | 1.905             | 0.698-5.194  | 0.208  | 1.403             | 0.338-5.827  | 0.641  |
| III                      | 1.968             | 0.730-5.310  | 0.181  | 1.595             | 0.389-6.536  | 0.517  |
| IV                       | 6.520             | 2.310-18.405 | <0.001 | 10.650            | 2.076-54.626 | 0.005  |
| <b>LN resected</b>       | 0.988             | 0.978-0.998  | 0.017  | 0.975             | 0.959-0.992  | 0.004  |
| <b>Tumor size(cm)</b>    | 1.121             | 1.045-1.201  | 0.001  | 1.058             | 0.932-1.201  | 0.382  |
| <b>Surgical approach</b> |                   |              |        |                   |              |        |
| Sweet                    | 1                 |              |        | 1                 |              |        |
| McKeown                  | 0.790             | 0.625-0.997  | 0.047  | 0.852             | 0.577-1.257  | 0.419  |
| <b>Adjuvant therapy</b>  |                   |              |        |                   |              |        |
| No                       | 1                 |              |        | 1                 |              |        |
| Yes                      | 0.704             | 0.490-0.876  | <0.001 | 1.116             | 0.690-2.142  | 0.499  |

HR=hazard ratio; CI=confidence interval; LN= lymph node.
