# Supplementary material for: Comparison of Outcomes Between McKeown and Sweet Esophagectomy in the Elderly Patients for Esophageal Squamous Cell Carcinoma: A Propensity Score-Matched Analysis
Source: PubMed Central journal article supplement (PMC7020469; doi:10.1177/1073274820904700), 2020-02-12
Supplement: supplmental_table_3.pdf [file supplmental_table_3.pdf]

Supplemental table 3. Univariate cox regression analysis of prognostic factors influencing disease-free survival.

| Variables                | Patients<70 years |              |        | Patients≥70 years |              |        |
|--------------------------|-------------------|--------------|--------|-------------------|--------------|--------|
|                          | HR                | 95% CI       | P      | HR                | 95% CI       | P      |
| <b>Gender</b>            |                   |              |        |                   |              |        |
| Female                   | 1                 |              |        | 1                 |              |        |
| Male                     | 1.607             | 1.032-2.506  | 0.036  | 1.342             | 0.543-3.318  | 0.524  |
| <b>Location</b>          |                   |              |        |                   |              |        |
| Upper third              | 1                 |              |        | 1                 |              |        |
| Middle third             | 1.111             | 0.669-1.844  | 0.684  | 1.281             | 0.500-3.279  | 0.606  |
| Lower third              | 0.882             | 0.529-1.471  | 0.629  | 0.583             | 0.188-1.810  | 0.351  |
| <b>T stage</b>           |                   |              |        |                   |              |        |
| 1                        | 1                 |              |        | 1                 |              |        |
| 2                        | 0.560             | 0.199-1.575  | 0.272  | 0.324             | 0.109-1.860  | 0.336  |
| 3                        | 0.837             | 0.322-2.177  | 0.715  | 2.464             | 0.834-3.892  | 0.538  |
| <b>N stage</b>           |                   |              |        |                   |              |        |
| 0                        | 1                 |              |        | 1                 |              |        |
| 1                        | 2.108             | 1.430-3.109  | <0.001 | 1.217             | 0.504-2.940  | 0.662  |
| 2                        | 3.353             | 2.228-5.047  | <0.001 | 2.079             | 0.795-5.436  | 0.136  |
| 3                        | 4.460             | 2.472-8.046  | <0.001 | 3.119             | 2.173-7.146  | <0.001 |
| <b>Grade</b>             |                   |              |        |                   |              |        |
| 0                        | 1                 |              |        | 1                 |              |        |
| 1                        | 0.788             | 0.295-2.105  | 0.634  | 1                 |              |        |
| 2                        | 1.310             | 0.530-3.237  | 0.558  | 0.548             | 0.227-1.325  | 0.182  |
| 3                        | 1.504             | 0.601-3.764  | 0.383  | 0.981             | 0.378-2.544  | 0.968  |
| <b>TNM staging</b>       |                   |              |        |                   |              |        |
| I                        | 1                 |              |        | 1                 |              |        |
| II                       | 2.547             | 0.620-10.464 | 0.195  | 3.409             | 0.710-15.921 | 0.310  |
| III                      | 2.206             | 0.543-8.969  | 0.269  | 4.212             | 0.856-9.815  | 0.290  |
| IV                       | 6.345             | 1.438-27.997 | 0.015  | 5.924             | 0.601-9.340  | 0.431  |
| <b>LN resected</b>       | 0.989             | 0.976-1.002  | 0.104  | 0.986             | 0.959-1.014  | 0.336  |
| <b>Tumor size(cm)</b>    | 1.118             | 1.020-1.225  | 0.017  | 1.136             | 0.898-1.436  | 0.287  |
| <b>Surgical approach</b> |                   |              |        |                   |              |        |
| Sweet                    | 1                 |              |        | 1                 |              |        |
| McKeown                  | 0.992             | 0.726-1.356  | 0.962  | 0.608             | 0.285-1.299  | 0.199  |
| <b>Adjuvant therapy</b>  |                   |              |        |                   |              |        |
| No                       | 1                 |              |        | 1                 |              |        |
| Yes                      | 0.557             | 0.370-0.838  | <0.001 | 0.875             | 0.490-1.981  | 0.319  |

HR=hazard ratio; CI=confidence interval; LN= lymph node.
